# Supplementary material
Source: PubMed Central journal article supplement (PMC1323456)
Supplement: pcbi.0010067.st001.pdf [file pcbi.0010067.st001.pdf]

# Supporting Table S1: Accuracy of the WM-polynomial Approximation

Rahul Siddharthan

Eric D. Siggia

Erik van Nimwegen

October 28, 2005

| Initial motif<br>+ added bases | Exact<br>q=0.2 | Approx<br>q=0.2 | Exact<br>q=0.5 | Approx<br>q=0.5 | Exact<br>q=0.8 | Approx<br>q=0.8 |
|--------------------------------|----------------|-----------------|----------------|-----------------|----------------|-----------------|
| AAAA                           | 4.480          | 4.480           | 1.782          | 1.782           | 1.163          | 1.163           |
| + A                            | 10.767         | 10.767          | 3.657          | 3.657           | 2.033          | 2.033           |
| + AA                           | 28.014         | 27.910          | 8.634          | 8.524           | 4.322          | 4.288           |
| + AAA                          | 77.121         | 76.505          | 22.238         | 21.649          | 10.334         | 10.170          |
| + AAAA                         | 221.581        | 218.915         | 60.852         | 58.499          | 26.747         | 26.135          |
| + AAAAA                        | 658.449        | 648.170         | 174.199        | 165.669         | 73.317         | 71.219          |
| + AAAAAA                       | 2010.814       | 1973.182        | 516.480        | 486.782         | 209.939        | 202.965         |
| + AAAAAAA                      | 6281.266       | 6146.959        | 1575.074       | 1473.396        | 622.189        | 599.239         |
| + AAAAAAAA                     | 19998.835      | 19525.479       | 4916.044       | 4570.058        | 1896.056       | 1820.599        |
| AAAA                           | 4.480          | 4.480           | 1.782          | 1.782           | 1.163          | 1.163           |
| + A                            | 10.767         | 10.767          | 3.657          | 3.657           | 2.033          | 2.033           |
| + AT                           | 5.018          | 5.052           | 1.998          | 2.035           | 1.270          | 1.281           |
| + ATA                          | 11.645         | 11.712          | 4.100          | 4.149           | 2.317          | 2.327           |
| + ATAT                         | 8.807          | 8.925           | 3.516          | 3.641           | 2.204          | 2.243           |
| + ATATA                        | 19.956         | 20.193          | 7.198          | 7.396           | 4.114          | 4.165           |
| + ATATAT                       | 19.042         | 19.400          | 7.623          | 8.000           | 4.738          | 4.858           |
| + ATATATA                      | 42.412         | 43.139          | 15.568         | 16.210          | 8.966          | 9.145           |
| + ATATATAT                     | 46.564         | 47.646          | 18.682         | 19.826          | 11.548         | 11.916          |
| AACG                           | 0.601          | 0.601           | 0.576          | 0.576           | 0.549          | 0.549           |
| + A                            | 0.880          | 0.880           | 0.779          | 0.779           | 0.673          | 0.673           |
| + AA                           | 1.546          | 1.542           | 1.309          | 1.299           | 1.064          | 1.057           |
| + AAT                          | 0.623          | 0.623           | 0.542          | 0.541           | 0.458          | 0.457           |
| + AATA                         | 1.123          | 1.120           | 0.946          | 0.938           | 0.762          | 0.756           |
| + AATAA                        | 2.233          | 2.222           | 1.839          | 1.811           | 1.430          | 1.411           |
| + AATAAC                       | 1.381          | 1.375           | 1.159          | 1.144           | 0.928          | 0.918           |
| + AATAACA                      | 2.748          | 2.731           | 2.263          | 2.221           | 1.760          | 1.732           |
| + AATAACAA                     | 5.841          | 5.796           | 4.742          | 4.629           | 3.602          | 3.528           |

Exact values of the WM integral, and our monomial approximation, when a series of independent bases is added successively to an aligned set of four bases descended from a common ancestor with proximity  $q$ . Even when eight bases are added to the original four, the errors are relatively small.
